# Extended lifetime of respiratory droplets in a turbulent vapour puff and its implications on airborne disease transmission

Kai Leong Chong<sup>1,5</sup>, Chong Shen Ng<sup>1,5</sup>, Naoki Hori<sup>1</sup>, Rui Yang<sup>1</sup>, Roberto Verzicco<sup>1,2,3,6</sup>, and Detlef Lohse<sup>1,4,6</sup>

<sup>1</sup>Physics of Fluids Group, Max Planck Center for Complex Fluid Dynamics, J. M. Burgers Center for Fluid Dynamics and MESA+ Research Institute, Department of Science and Technology, University of Twente, 7500AE Enschede, The Netherlands

<sup>2</sup>Gran Sasso Science Institute - Viale F. Crispi, 7 67100 L'Aquila, Italy

<sup>3</sup>Dipartimento di Ingegneria Industriale, University of Rome 'Tor Vergata', Roma 00133, Italy

<sup>4</sup>Max Planck Institute for Dynamics and Self-Organisation, 37077 Göttingen, Germany

<sup>5</sup>These authors contributed equally: Kai Leong Chong, Chong Shen Ng

<sup>6</sup>These authors jointly supervised this work: Roberto Verzicco, Detlef Lohse

August 4, 2020

## Abstract

To mitigate the COVID-19 pandemic, it is key to slow down the spreading of the life-threatening coronavirus (SARS-CoV-2). This spreading mainly occurs through virus-laden droplets expelled at speaking, screaming, shouting, singing, coughing, sneezing, or even breathing [1–7]. To reduce infections through such respiratory droplets, authorities all over the world have introduced the so-called “2-meter distance rule” or “6-foot rule”. However, there is increasing empirical evidence, e.g. through the analysis of super-spreading events [6, 8–11], that airborne transmission of the coronavirus over much larger distances plays a major role [1–3, 7, 12–15], with tremendous implications for the risk assessment of coronavirus transmission. It is key to better and fundamentally understand the environmental ambient conditions under which airborne transmission of the coronavirus is likely to occur, in order to be able to control and adapt them. Here we employ direct numerical simulations of a typical respiratory aerosol in a turbulent jet of the respiratory event within a Lagrangian-Eulerian approach [16–18] with 5000 droplets, coupled to the ambient velocity, temperature, and humidity fields to allow for exchange of mass and heat [19] and to realistically account for the droplet evaporation under different ambient conditions. We found that for an ambient relative humidity of 50% the lifetime of the smallest droplets of our study with initial diameter of 10  $\mu\text{m}$  gets extended by a factor of more than 30 as compared to what is suggested by the classical picture of Wells [20, 21], due to collective effects during droplet evaporation and the role of the respiratory humidity [22], while the larger droplets basically behave ballistically. With increasing ambient relative humidity the extension of the lifetimes of the small droplets further increases and goes up to 150 times for 90% relative humidity, implying more than two meters advection range of the respiratory droplets within one second. Smaller droplets live even longer and travel further. Our results may explain why COVID-19 superspreading events can occur for large ambient relative humidity such as in cooled-down meat-processing plants [10] or in pubs with poor ventilation. We anticipate our tool and approach to be starting points for larger parameter studies and for optimizing ventilation and indoor humidity controlling concepts, which in the upcoming autumn and winter both will be key in mitigating the COVID-19 pandemic.

Airborne transmission of COVID-19 by respiratory aerosols consisting of small and tiny saliva and mucus droplets is increasingly believed to be a crucial factor in the spreading of the pandemic, in particular in indoor situations [1–3, 7, 12–15]. Hitherto laboratory studies have focused on the virological side, by investigating the viral load of the droplets [23]. Unfortunately, surprisingly little is

45 known on the actual fate of the respiratory droplets, once they have been expelled. Such knowledge,  
46 however, is vital to reduce the number of infections and the reproduction factor  $R$  of COVID-19. Many  
47 key questions are intimately related to fluid dynamics and flow physics: (i) How many droplets are  
48 actually expelled at the different respiratory events? (ii) What is their initial size distribution? (iii)  
49 What is the lifetime of these respiratory droplets and how does it depend on humidity and temperature?  
50 (iv) To what degree do collective effects inside the humid cloud of droplets play a role? (v) How do  
51 the aerosol droplets distribute, in particular indoors, and what are ventilation concepts to get rid of  
52 them?

53 The answers to all of these questions are key to reduce the further spreading of COVID-19 [6,  
54 7, 24]. Up to now, without sufficient answers to above questions, the authorities attempt to reduce  
55 the spreading with social distancing and the so-called 'distance rule', which in fact had already been  
56 suggested by G. A. Soper in his 1919 Science article "The lessons of the pandemic" (then Spanish  
57 Flu): The distance between people should not be less than one and a half, or better yet, two meters  
58 ("six-foot rule"). This rule is based on a theory of viral infection by droplets from the 1930s and earlier.  
59 The picture that William F. Wells developed at that time [20, 21] in connection with the transmission  
60 of tuberculosis was the following: The drops produced by sneezing and coughing would have a wide  
61 size distribution and would fly out of the mouth and nose without much interaction between them.  
62 The small droplets would hardly be a problem because they would evaporate very quickly in the air  
63 and leave dry and therefore – as was thought – less dangerous aerosol particles behind, while the large  
64 droplets would behave ballistically. In this model, which is still used for risk assessment, the border  
65 between large and small is set at a droplet diameter of  $d = 5 - 10 \mu\text{m}$ . When the droplets have a  
66 diameter larger than 5 to 10  $\mu\text{m}$ , the World Health Organisation (WHO) defines them as respiratory  
67 droplets and the corresponding infections as host-to-host route, while smaller droplets are referred  
68 to as droplet nuclei and the infections as aerosol route [25, 26]. For comparison: air drag on droplets  
69 becomes negligible beyond a diameter of  $d \gtrsim 100 \mu\text{m}$  and a coronavirus has a typical diameter of about  
70 120 nm.

71 However, in recent months the empirical evidence that the six-foot rule is not sufficient to protect  
72 against infection with the coronavirus has kept on accumulating and various so-called super-spreading  
73 events have been reported, see e.g. [6, 8–11, 27–29], all of them indoors. These super-spreading events  
74 suggest airborne transmission of the coronavirus [1–3, 12–14], with tremendous implications for the  
75 risk assessment of coronavirus transmission. Indeed, over the last years L. Bourouiba and coworkers  
76 have shown [1, 22, 30, 31] that the range and the lifetime of the cloud of tiny saliva and mucus droplets  
77 (called respiratory droplets or aerosols in this paper) is much larger than what the 6-foot rule assumes,  
78 namely up to 8 meters and up to 10 minutes, instead of one to two meters and less than one second.  
79 The reason for this is that the droplets of saliva and mucus are expelled together with warm and humid  
80 air, which considerably delays their evaporation. In addition, they are ejected as a cloud, whereby  
81 they protect each other against evaporation, so to speak: The rate of evaporation is determined by  
82 the moisture gradient on the surface of the droplets. This is, of course, much smaller in a cloud  
83 of droplets where each of the droplets releases water vapor to the environment than for individual,  
84 isolated droplets. These two effects together can easily considerably delay the evaporation of the small  
85 aerosol droplets [1]. Indeed, as Villermaux and coworkers pointed out [32, 33], the lifetime of droplets  
86 in an aerosol is determined by the turbulent mixing process, rather than by the so-called " $d^2$ -law",  
87 which only applies to an *isolated* evaporating spherical droplet, whose square of its diameter  $d$  linearly  
88 decreases with time [34] and on which the estimates by Wells [20, 21] were based. The vastly different  
89 fate of droplets in a humid cloud of other droplets have also been demonstrated for evaporating dense  
90 sprays [32, 33] and for the vaporization of combustion fuels [35, 36].

91 An increasing number of studies – both empirical, from the medical side, from fluid dynamics,  
92 and from the aerosol side – is supporting the view that long-distance airborne transmission through  
93 multiphase turbulent droplet cloud emission is an essential factor [1–7, 12, 24, 37–41]. Prather *et al.* [6]  
94 give strong evidence that SARS-CoV-2 is spreading over large distances in aerosols exhaled by highly  
95 contagious infected individuals with no symptoms, a view supported in refs. [13, 15, 42, 43]. Owing to  
96 their small size, aerosols may lead to higher severity of COVID-19 because virus-containing aerosols

97 penetrate more deeply into the lungs. These aerosols can accumulate, remain infectious in indoor air  
98 for hours, and be easily inhaled deep into the lungs.

99 Interestingly, in spite of the major research effort of the last months in particular, the role of  
100 environmental factors such as temperature and humidity remains controversial and inconclusive [44,  
101 45]. Various researchers have tried to establish empirical relations between the temperature and the  
102 humidity and the number of infections, but given that presumably most infections have happened  
103 indoors, it is not surprising that such efforts have remained unsuccessful [7, 44, 45].

104 The main difficulty in getting conclusive and reproducible results originates from the lack of con-  
105 trolled conditions under which the spreading events occur. However, controlled experiments under  
106 well-defined conditions such as flow rate, droplet size distribution, temperature, and relative humidity  
107 are very difficult to achieve and even with controlled and reproducible conditions, following 1000s of  
108 microdroplets in space and time remains extremely challenging.

109 A good alternative thereof are direct numerical simulations. These not only allow to follow 1000s of  
110 microdroplets in turbulent flow, but also to straightforwardly vary the control parameters such as the  
111 droplet density, the type and strength of ventilation, the ambient temperature and the ambient relative  
112 humidity, in order to elucidate how these control parameters affect the lifetime of the respiratory  
113 droplets. In this way we want to elucidate the flow physics of these droplets, with the ultimate goal  
114 to be able to take suitable countermeasures against the spread of the coronavirus and thus to reduce  
115 the COVID-19 reproduction factor  $R$ .

116 However, such direct numerical simulations are highly nontrivial, too. It has been attempted with  
117 Euler-Lagrangian approaches with Reynolds-averaged Navier-Stokes (RANS) approximations for a  
118 single droplet [46], for multiple droplets [47–49] and large eddy simulations (LES) [50], which however  
119 are insufficient to properly resolve the small scales of the mixing process, which are crucial for the  
120 droplet evaporation. Also temperature and humidity fields are not fully coupled, which however  
121 determine the evaporation rate and thus the lifetime of the droplets and are essential to properly  
122 describe their collective effects. The importance of these couplings have indeed been recognized in  
123 simulations of other aerosols, such as in combustion [51]. Other attempts include simulations with  
124 continuum models [52, 53] or mathematical models [54, 55].

125 To overcome these difficulties and to take the full physics into account, here we perform direct nu-  
126 merical simulations of a respiratory event *without flow modelling*, with the temperature and humidity  
127 field fully coupled to the Navier-Stokes equation, and 1000s of droplets of a given initial size distribu-  
128 tion (adopted from experiment [56]) treated in an Euler-Lagrangian way, with mass and temperature  
129 exchange with the environment to allow for evaporation and condensation, similarly as ref. [57]. This  
130 is only possible thanks to a highly efficient and parallelized advanced finite difference Navier-Stokes  
131 solver (“AFiD”) based on a second-order finite difference scheme [58], coupled to the advection equa-  
132 tions for temperature and vapor concentration, both in Boussinesq approximation [59]. Details of the  
133 numerical scheme and setup are given in the Method Section (supplementary material). The objective  
134 of this numerical work is not only to elucidate the flow physics of a respiratory event and in particular  
135 how and why the lifetime of the respiratory droplets is hugely increased as compared to the case of  
136 isolated droplets and how this depends on the ambient conditions such as the ambient humidity, but  
137 also to sketch the essential ingredients of a numerical tool, which can be used for further parameter  
138 studies and more complex situations of respiratory events, in particular in indoor situations.

## 139 Numerically simulating a respiratory event

140 We simulated a turbulent puff sustained over a duration of 0.6s into ambient air and laden with  
141 5000 water droplets, mimicking a strong cough. In addition to the droplets, the turbulent puff expels  
142 hot, vapor saturated air with an initial temperature 34 °C and relative humidity 100% [22]. Both  
143 temperature and vapor fields are buoyant. As reference ambient conditions, we chose the typical indoor  
144 ambient temperature of 20 °C and varying relative humidity between 50% and 90%. The background  
145 airflow conditions can also be an important factor, e.g. with or without ventilation [56]. Here we chose

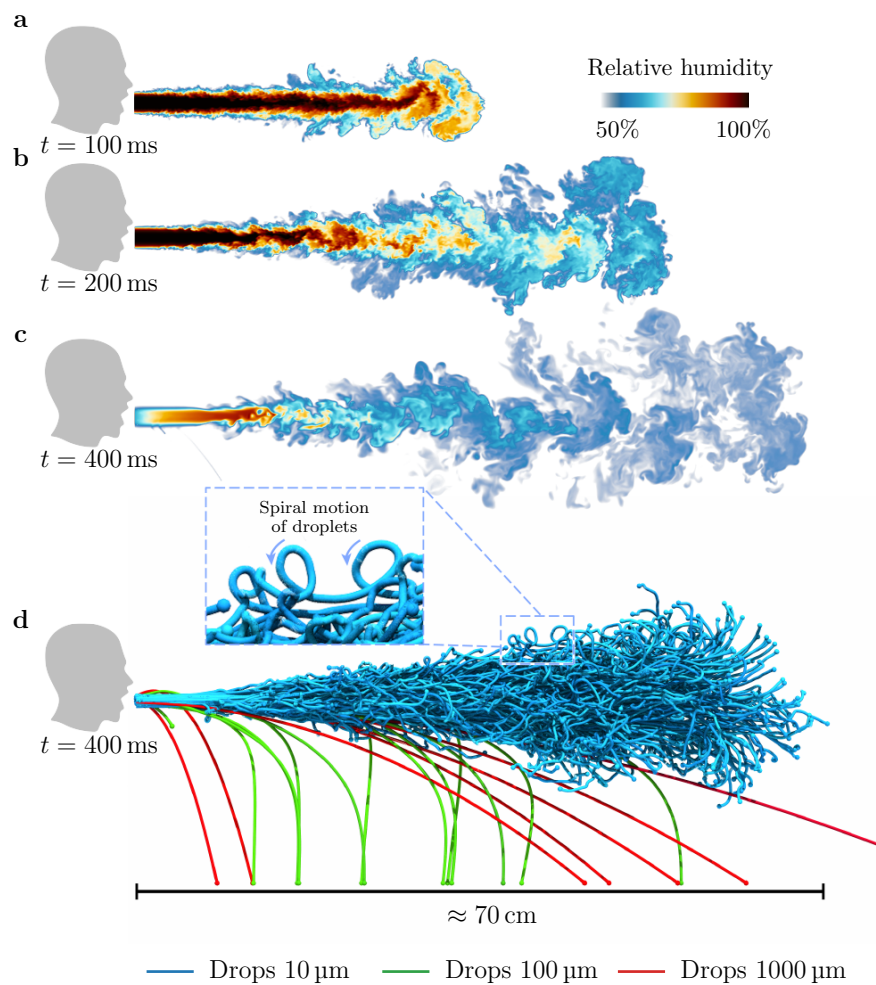

Figure 1: **Visualisations of droplets in a heavy cough for RH = 50%:** a-d, Snapshots of the droplet-laden cough simulation. At time  $t = 100$  ms, the cough contains hot air with high moisture content. The hot moist air propagates ( $t \approx 200$  ms) and dissipates ( $t \approx 400$  ms) into the ambient surroundings. At  $t \approx 400$  ms, we show larger droplets falling out from the puff whereas smaller droplets remain protected and are carried along by the puff.

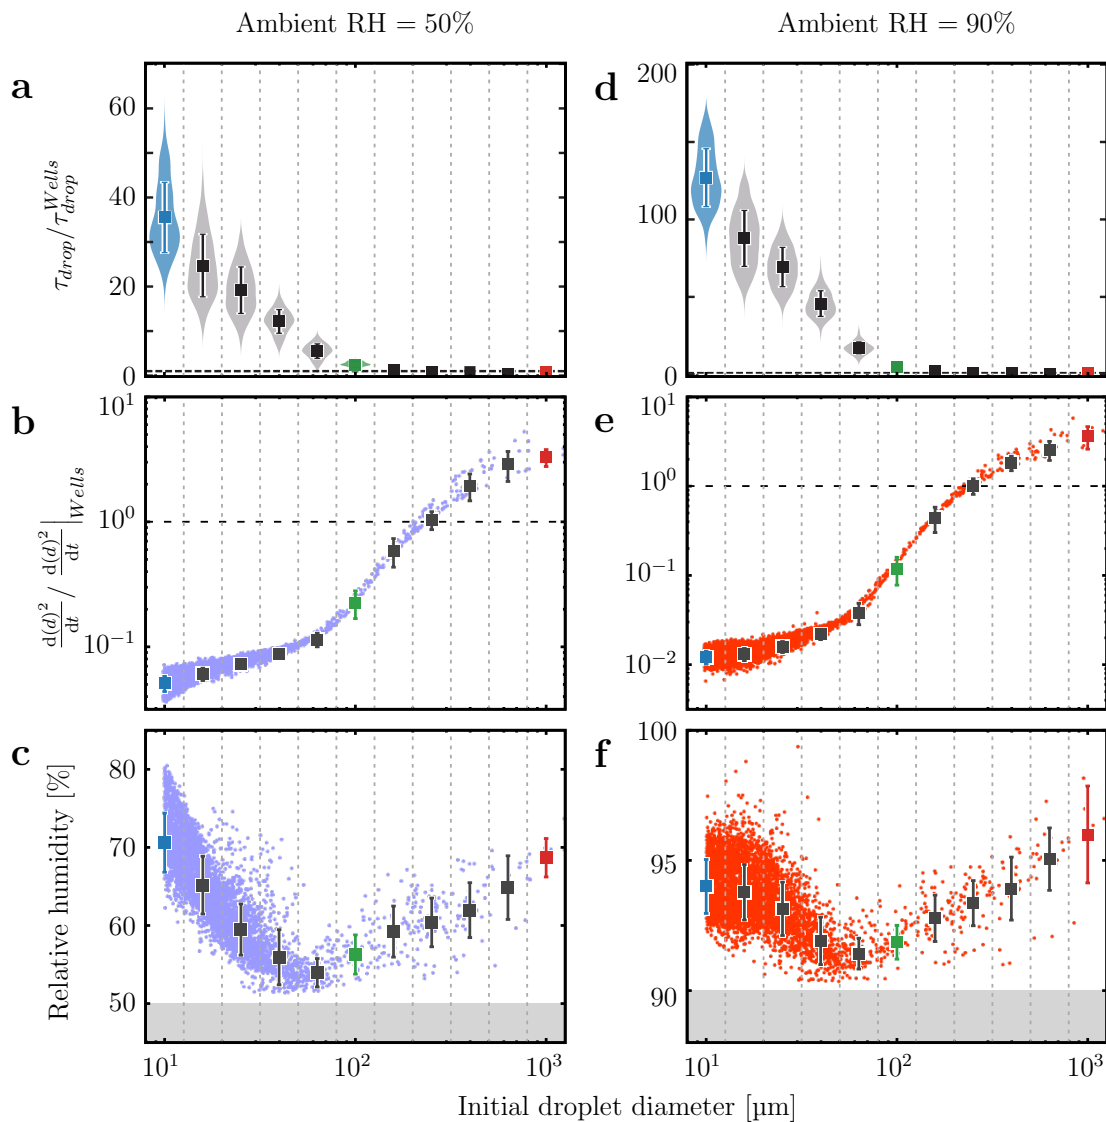

Figure 2: **Statistics of droplets for different ambient RH.** (a-c), ambient RH = 50% and (d-f), ambient RH = 90%. Graphs showing statistics of droplets plotted against their initial diameters,  $d$ . **a,d**, Lifetime distribution of droplets compared to lifetime estimation from Wells [20] (dashed horizontal line). **b,e**, Averaged change of the surface area of a droplet throughout its lifetime compared to that from Wells' estimation (dashed horizontal line). **c,f**, Averaged relative humidity. For illustrative purposes, different colours denote different initial droplet diameters: blue ( $d = 10 \mu\text{m}$ ), green ( $d = 100 \mu\text{m}$ ) and red ( $d = 1000 \mu\text{m}$ ). Plots show mean values with one standard deviation ranges.

146 a quiescent background field, but different types of ventilation could be embodied straightforwardly.

147 The topic of distribution of the initial droplet sizes is in itself a subject of considerable importance  
148 and active debate [56,60,61]. Here, we seeded the respiratory event with droplets with initial diameters  
149 ranging between 10  $\mu\text{m}$  and roughly 1000  $\mu\text{m}$ , based on an experimental measurement [56]. Note that  
150 even smaller droplets could be added, but they would further extend the required CPU time and are  
151 not necessary to convey the main message of this work. The droplets and the turbulent puff are two-  
152 way coupled [57], that is, the droplets exchange heat and vapor mass to their surroundings. Given the  
153 dilute nature of the dispersed phase, here, we neglected the momentum exchange. Post-expulsion, we  
154 tracked the cough and droplets up to several seconds, which is sufficient to reveal the physics of their  
155 collective evaporation.

156 For more details on the underlying equations, the numerical simulations, and the values of the  
157 control parameters, both dimensional and non-dimensional, we refer to the Methods Section.

## 158 Considerably extended lifetime of the smaller droplets

159 We first describe our results for fixed ambient relative humidity of  $\text{RH} = 50\%$ . Within about 200 ms  
160 from the start of the cough, droplets larger than about 100  $\mu\text{m}$  are observed to immediately fall out  
161 from the ‘puff’, basically behaving ballistically. The associated distances of this fallouts typically  
162 range between 0.1 m and 0.7 m from the source (Fig.1d). Indeed, this type of fallout has already been  
163 predicted in the 1930s by Wells [20,21], and also demonstrated in the cough and sneeze experiments  
164 by [22]. These typical distances appear to be the basis of the spatial separation guidelines issued by  
165 the WHO, CDC, and European Centre for Disease Prevention and Control on respiratory protection  
166 for COVID-19 [15].

167 However, droplets smaller than 100  $\mu\text{m}$  behave completely differently. Note again that, according  
168 to the WHO definition, respiratory infections transmitted by these smaller droplets (diameter  $d \leq$   
169 100  $\mu\text{m}$ ) are considered to be occurring through the droplet transmission route. Here we see that  
170 they are airborne anyhow: Indeed, whilst larger droplets basically fall downwards like a projectile  
171 following a parabola, the paths traced by such smaller droplets remain largely horizontal and form  
172 spirals, consistent with the airborne infection scenario.

173 The physical explanation of the two very different behaviors is straightforward: Larger droplets  
174 fall under the influence of their own weight and are unperturbed by the surrounding airflow. In  
175 contrast, smaller droplets settle slower than the characteristic velocity of the surrounding fluid, and  
176 are therefore advected further by the local turbulent flow. This latter mechanism is intimately related  
177 to the ‘airborne’ transmission route for infectious diseases [62]. Thus, smaller droplets are clearly  
178 heavily influenced by the turbulent dispersive processes.

179 That the smaller droplets tend to remain inside the humid puff has dramatic consequences on their  
180 *lifetimes*, which far exceed those of isolated droplets (Fig.2a,d). Here we report results for ambient  
181 relative humidity (RH) of 50% and 90%, respectively. In the former case ( $\text{RH} = 50\%$ ), the droplets  
182 of 10  $\mu\text{m}$  can live up to 60 times longer than the expected value by Wells, whereas in the latter case  
183 ( $\text{RH} = 90\%$ ), it can even become 100 to 200 times longer. These extended lifetimes are also confirmed  
184 by the much slower shrinkage rates of the droplet surface area as compared to the corresponding rate  
185 determined from the  $d^2$ -law, which is valid for isolated droplets and which is the basis for Wells’ theory  
186 and the 6-foot distance rule, see Fig.2b,e.

187 We now further describe the flow physics contributing to this highly extended lifetime of the small  
188 droplets. The first physical factor depends on the motion of droplets relative to their surrounding  
189 fluid. As shown in Fig.1d, smaller droplets have the tendency to be captured by the turbulent puff and  
190 move together with the fluid. This gives rise to smaller relative velocities and hence less evaporation  
191 due to the reduction of convective effects. In contrast, larger droplets tend to fly and settle faster than  
192 the surrounding fluid, thus evaporating faster than predicted by the  $d^2$ -law, because the convective  
193 effects, carrying the evaporated vapor away from the droplet, are considerable. This rapid evaporation  
194 is shown in the faster shrinkage rate of the droplet surface areas in Fig.2b,e.

195 The second and more crucial factor is the influence of the humid air around the small droplets,  
196 originating from the humid puff and the ambient surroundings. In order to quantify this effect on the  
197 lifetime, we show the averaged relative humidity of the droplets throughout the simulation as function  
198 of the initial droplet diameter  $d$  in Fig.2c,f. From this figure, we observe a clear non-monotonic  
199 behavior reflecting two different regimes. In the first regime for small droplets  $d = 10 - 100\mu\text{m}$ , the  
200 relative humidity takes higher values than the ambient, reflecting that the droplets are surrounded by  
201 nearly saturated humid vapor. As the initial droplet size increases, the relative humidity decreases  
202 because the settling speed increases and the droplets tend to stray from the puff (Fig.1d). In the  
203 second regime, for large droplets  $d > 100\mu\text{m}$ , however, we observe that the relative humidity increases  
204 with the increase in size. The reason is that larger droplets evaporate larger quantities of vapor per  
205 given time, which leads to higher relative humidity in their surroundings. This effect is very local, due  
206 to the strong shear around the falling droplets.

## 207 Propagation of the turbulent humid puff

208 Since the humid puff leads to extended droplet lifetimes, it is instructive to examine the propagation  
209 of the humidity field. Indeed, also in the case of dense sprays [32,33], the droplets' fate is determined  
210 by the vapor concentration field. Therefore, as pointed out above, the problem of droplet evaporation  
211 in a respiratory puff is intimately related to scalar mixing in turbulent flow [63,64].

212 In Fig.3a,b, we show the relative humidity in the puff as function of time and distance from the  
213 respiratory release event, in order to quantify the propagation of the puff after exhalation. Very soon  
214 after the respiratory event starts, moist air coming out of the mouth creates very high humidity region  
215 in the vicinity  $\approx 0.3\text{m}$  of the mouth in 0.2s. Although the overall humidity rapidly decreases after  
216 the respiratory event stops, the puff continues to propagate because of the conservation of momentum  
217 with the puff edge growing proportionally as  $t^{1/4}$  as predicted by Bourouiba *et al.* [22], see the solid  
218 line in Fig.3, which is an upper bound to our numerical results.

219 Here we have considered a heavy, but single cough scenario, having 0.6s duration. It should be  
220 noted that the travel distance and speed can be much further and faster in the case of continuous  
221 talking or successive coughing or sneezing [1,50]. The question on how far the puff can spread in these  
222 cases can be answered based on our single cough simulation. The spatial-temporal plot in Fig.3a,b  
223 show that the edge of the puff propagates much faster than  $t^{1/4}$  before the end of coughing. Therefore,  
224 for successive coughing with the puff advecting at a cycle average speed of 2 - 3 m/s, the edge of puff  
225 can easily exceed 2 m in a second, while most of the droplets around  $10\mu\text{m}$  are still not evaporated  
226 because of the extended lifetime favored by the vapour puff. Droplets with an initial diameter even  
227 smaller than  $10\mu\text{m}$  will travel even further and live even longer.

## 228 Evaporation-falling curves and histograms

229 The extended lifetime of the small droplets can also be expressed in the so-called evaporation-falling  
230 curve, as introduced in the classical work by William F. Wells [20]. He derived the dependence of the  
231 lifetime of the droplet on its size, based on the  $d^2$ -law for evaporation of an isolated droplet and on the  
232 droplet settling time, see the dashed horizontal curves in Fig.3c,d. According to this classical theory  
233 by Wells, droplets below this line evaporate completely and thus should not exist. In those figures  
234 we now include the histograms of the counts of droplets at given size and time, based on our direct  
235 numerical simulations of the respiratory events at an RH of 50% and 90%, respectively. Note that the  
236 time (on the  $x$ -axis) is shifted to the expulsion time for each droplet, such that the history of each  
237 droplet begins at time = 0s. Fig.3c,d clearly show that a considerable number of small droplets do  
238 exist below the classical Wells curve, demonstrating that the classical Wells estimate is inappropriate  
239 and that small droplets can live much longer. If a background flow exists or in the case of successive  
240 respiratory events, these long-lived droplets can easily travel much farther than 2 m in a second as  
241 carried by the turbulent puff, as shown in the advected distances estimated in Fig.3c,d.

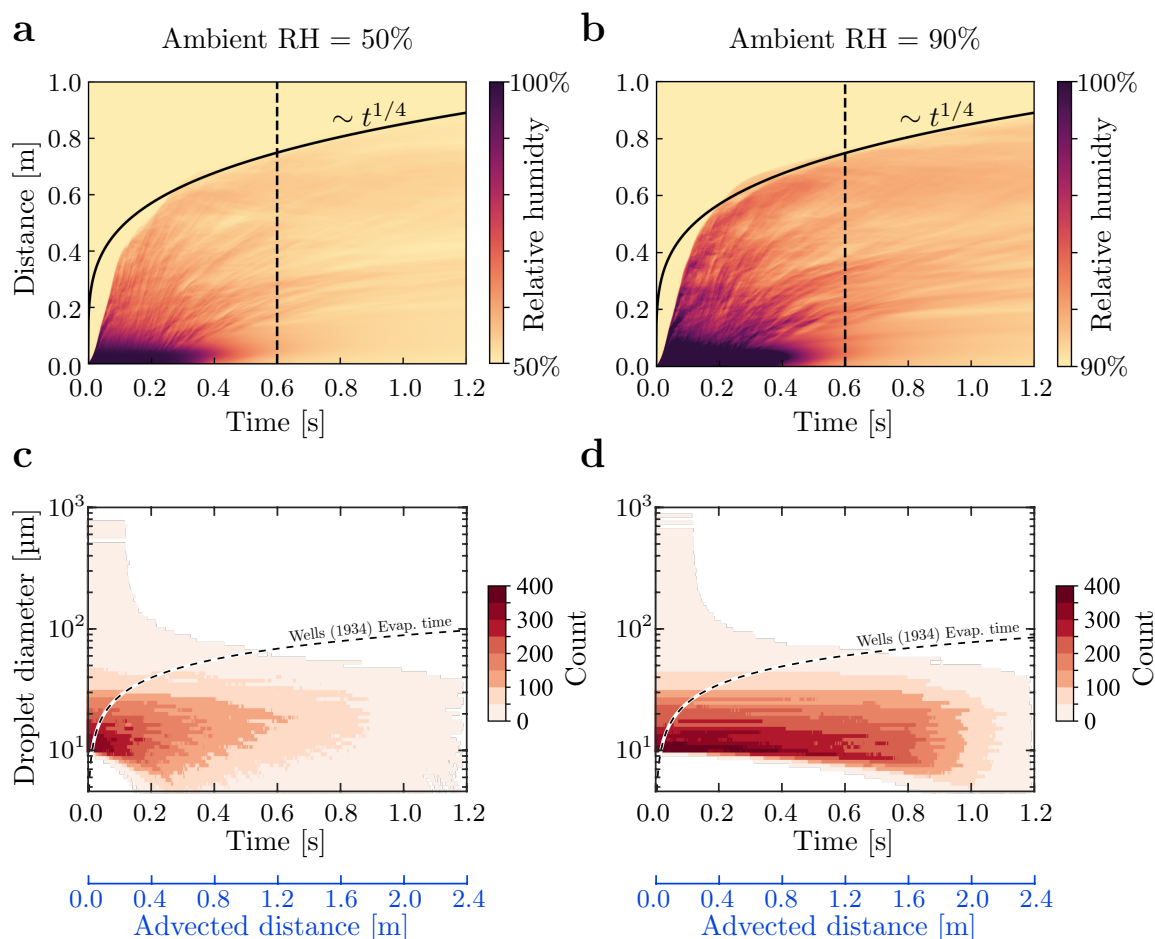

**Figure 3: Spatial-temporal variation of relative humidity for ambient RH = 50% and 90%:** **a,b** Relative humidity variation in space and time. The dark violet colour indicates the region with high relative humidity which can protect the droplets from shrinking. The vertical dashed line indicates the moment at which the coughing stops. After the stoppage of the coughing, the distance of the puff has the power-law relationship with time with scaling exponent 1/4, which can be obtained based on the conservation of momentum. **Comparison of expected droplet lifetime for different droplet sizes and for ambient RH = 50% and 90%:** **c,d** Count histogram of droplets at a given size and time. Time is shifted to the expulsion time for each droplet. The dashed line delineates the expected droplet lifetimes that completely evaporate, which is computed according to the assumptions by Wells [20], i.e., based on the  $d^2$ -law. According to this assumption, droplets should only exist above the dashed line, which, as can clearly be seen here, is not the case in the actual respiratory event. The blue axes below panels **c** and **d** show estimated advected distance of small droplets based on a cycle-averaged cough velocity of  $2 \text{ m s}^{-1}$ . Even smaller droplets with initial diameter below  $10 \mu\text{m}$  live even longer and are advected even further.



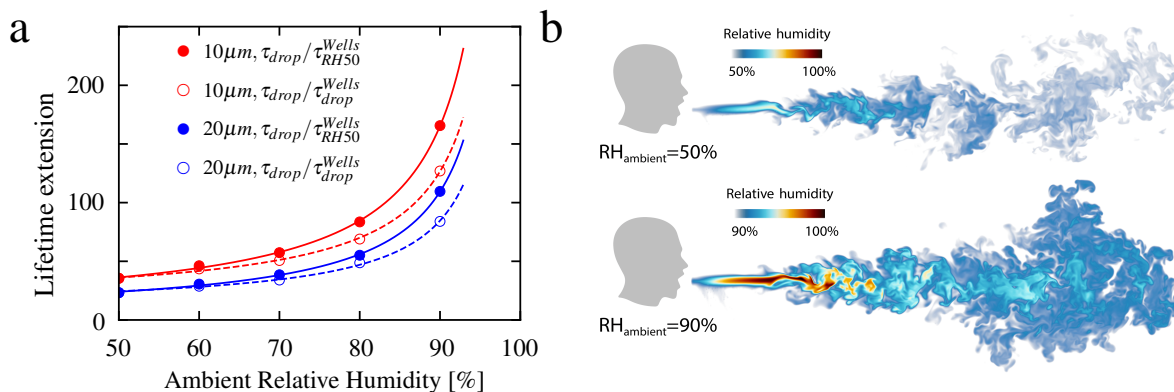

Figure 4: **Lifetime ratio for 10  $\mu\text{m}$  and 20  $\mu\text{m}$  droplets:** **a**, Extended lifetime as a function of relative humidity up to  $\text{RH} = 90\%$ . The curves in the figure are fitted according to the function  $y = a_1/(1 - x) + a_2$ , where  $a_1$  and  $a_2$  are the fitting parameters. **Visualisations of humid puff for ambient  $\text{RH} = 50\%$  and  $90\%$  at time 600 ms:** **b**, The humid puff maintains coherence for longer time and at much longer distances for larger ambient RH. Note the different humidity color scales for two shown cases.

## 242 Dependence on the ambient relative humidity RH

243 Up to now we have focused on two cases, namely with ambient relative humidity of 50% and of 90%,  
 244 respectively. Now we repeat the numerical simulations for further ambient relative humidities in the  
 245 window  $50\% \leq \text{RH} \leq 90\%$ . From Fig.4a one can observe that the lifetime of the small droplets  
 246 increases dramatically and even diverges to infinity at  $\text{RH} = 100\%$ . The smaller the droplets, the more  
 247 pronounced the effect. For the smallest respiratory droplets of this study with initial diameter  $d =$   
 248  $10 \mu\text{m}$ , for  $\text{RH} = 90\%$  the lifetime extension is with a factor of about 127 as compared to the lifetime  
 249 of a droplet behaving according to the Wells model, and even with a factor of 166 as compared to the  
 250 lifetime of Wells model droplet at  $\text{RH} = 50\%$ . Similarly, for slightly larger droplets with  $d = 20 \mu\text{m}$ ,  
 251 the lifetime extension remains significant with a factor of 84 and 109, respectively. The first reason  
 252 for the dramatic increases in droplet lifetime seen in Fig.4a is a significantly reduced evaporation rate  
 253 for larger ambient RH as the ambient gas is much closer to the saturated condition. What however  
 254 also considerably contributes is that for larger ambient RH the vapour puff can be sustained for longer  
 255 times and distances, as shown in Fig.4b. In such case, there is stronger protection from the vapour  
 256 puff for larger ambient RH.

## 257 Discussions

258 By tracking the interactions between respiratory droplets with the local velocity, temperature, and  
 259 vapour field within direct numerical simulations, we have demonstrated the huge difference between  
 260 droplet lifetimes in an actual respiratory event, as compared to that predicted according to Wells'  
 261 assumption. Our numerical results are qualitatively consistent with Bourouiba's multiphase cloud  
 262 emission model [1] and, in fact, quantify it, but are inconsistent with Wells' classical model, on which  
 263 the 6-foot distance rule is based. The reason is that Wells' model assumes that the droplets are  
 264 isolated, i.e., have no interaction with the near velocity, temperature, and in humidity fields around  
 265 the droplet, which is not the case in reality. Indeed, our study has conveyed that in particular the  
 266 humid vapor exhaled together with the droplets must not be neglected, as the vapor concentration  
 267 around the droplet remains high during the whole respiratory event and thereafter (see Fig.2a,d),  
 268 strongly contributing to the lifetime extension of the small droplets by orders of magnitude. In this

269 sense the lifetime of the respiratory droplets is mainly controlled by the mixing [63] of the humidity  
270 field exhaled together with them, similarly as occurring for the lifetime of evaporating dense sprays,  
271 which is also controlled by the mixing of the vapor field [32,33]. The relevant length scale for droplet  
272 evaporation is therefore not the diameter of the droplet itself (sub-millimeter), but the outer length  
273 scale of the surrounding turbulent velocity and humidity field, i.e., meters.

274 The lifetime of respiratory droplets has, to-date, grossly been underestimated (see Fig.3). The  
275 extension of the droplet lifetime is so extreme that the smallest droplets ( $d = 10 \mu\text{m}$ ) of our study  
276 barely evaporate (lifetime extension by factor 35 at ambient relative humidity  $\text{RH} = 50\%$  and even  
277 by factor 166 at  $\text{RH} = 90\%$ ) and are transported in an aerosolised manner. This finding contradicts  
278 the 'respiratory droplet' classification by WHO for  $d > 5\text{--}10 \mu\text{m}$  droplets, which implies that droplets of  
279 these sizes fall ballistically. From our results, there is strong evidence that even smaller droplets with  
280 initial diameter  $d \leq 10 \mu\text{m}$  will survive even far longer in aerosolised form, because of the protection  
281 from the turbulent humid puff.

282 Our results also show that the lifetime extension of the respiratory droplets is the more dramatic  
283 the larger the ambient relative humidity, see Fig.4a. The reason lies in the longer lifetime of the local  
284 humidity field around the droplets for larger ambient humidity  $\text{RH}$ , consistent with the picture that  
285 the mixing of the local humidity field determines the droplet lifetime, see Fig.4b. This finding may  
286 explain why many COVID-19 superspreading events have been reported in indoor environments with  
287 large ambient relative humidity. Examples are densely packed pubs with poor ventilation or meat-  
288 processing plants [10], in which the cooling down of the ambient air leads to very high indoor relative  
289 humidities. Note that high outdoor relative humidity obviously also leads to enhanced droplet lifetime,  
290 but in the context of the COVID-19 spread seems less relevant to us as most infections seem to happen  
291 indoors, due to in general sufficient ventilation outside.

292 To-date, the general measures to reduce the transmission of COVID-19 have mainly taken into  
293 account the mode of droplet transmission, leading to social distancing guidelines as the 6-foot rule [15].  
294 The analysis of various super-spreading events [6,8–11] has revealed that this is not sufficient, and our  
295 findings explain why, namely because of the dramatically enhanced lifetime of respiratory aerosols and  
296 droplets: Even droplets with a diameter of  $10 \mu\text{m}$ , which according to WHO terminology are called  
297 respiratory droplets and are claimed to be relevant only through the host-to-host infection route, can  
298 have a lifetime extension by a factor of 200.

299 Consequently, in addition to the 6-foot rule, various measures should be taken to reduce the respira-  
300 tory aerosol and droplet concentration in indoor environments [1–3,6,7,12–15,24,43]. This is of partic-  
301 ular importance in the upcoming autumn and winter when people are forced to be indoors. Soper [65],  
302 in his 1919 Science article “Lessons of the pandemic” (those days the so-called Spanish influenza) was  
303 right with his claim that “there is danger in the air in which they cough and sneeze” [65]. (With the  
304 knowledge of today, we must also add “speak”, “sing”, “scream”, and even “breath” [1,2,4,13,56].)  
305 Those days Soper came up with empirical rules to protect the population against this danger, namely  
306 (among others) “Open the windows - at home and at office” and “Suspects should wear masks” [65].

307 Today, we understand why Soper’s empirical rules work and are so crucial for the mitigation strategy  
308 against COVID-19 spreading. Following these rules contributes to dilute and reduce the concentra-  
309 tion of respiratory droplets and aerosols in indoor situations [6,24]. Our present work contributes  
310 to this understanding and our approach – direct numerical simulations with fully coupled velocity,  
311 vapor concentration and temperature fields and point-like droplets – even has the potential to further  
312 quantitatively contribute:

- 313 • First, indeed, *face masks* reduce or even block respiratory droplets entering indoor environments  
314 and have turned out to be a helpful measure against the spread of COVID-19 [15,66]. This  
315 reduction of the droplet input in indoor environments is the main function of face masks; in  
316 addition, depending on their quality and specification, they can also reduce the inhalation of  
317 respiratory droplets, which is of course essential for health-care workers dealing with COVID-19  
318 patients.
- 319 • Second, *efficient indoor ventilation concepts* [56,67,68] are equally crucial, to advect the humid

320 cloud with respiratory droplets out of the room or at least dilute its concentration. However,  
 321 note that, on the one hand, the humid vapor field can be diluted and rapidly “dissipated” by  
 322 ventilation, but on the other hand, it may lead to strong background flow, which results in long  
 323 propagation distance. The relative strength of the two effects must be examined in detail in  
 324 future research, and such indoor measures are becoming increasingly important after gradually  
 325 resuming from lockdown.

326 Our present work, however, also suggests a further and supplementary mitigation strategy against  
 327 COVID-19 infections, or, to be more precise, against high indoor respiratory droplets concentration,  
 328 namely:

- 329 • *Reduction of the ambient indoor relative humidity*, as this helps to reduce the lifetime of the  
 330 respiratory droplets and aerosols, see Fig.4.

331 Our results help to understand why these various mitigation strategies against COVID-19 are successful  
 332 and legitimate, but we also anticipate that our present tool and approach will be a starting point for  
 333 larger parameter studies and for further optimizing mitigation strategies such as ventilation and indoor  
 334 humidity controlling concepts.

## 335 Methods

### 336 Governing equations

337 The governing equations include the equations for gas phase and equations for droplets [57]. Both  
 338 temperature and vapour concentrations are coupled to the velocity field by employing the Boussinesq  
 339 approximation. The motion of the gas phase is assumed to be incompressible  $\partial u_i / \partial x_i = 0$ , and  
 340 governed by the momentum, energy, and mass fraction equations:

$$\frac{\partial u_i}{\partial t} + u_j \frac{\partial u_i}{\partial x_j} = -\frac{\partial p}{\partial x_i} + \nu_{air} \frac{\partial^2 u_i}{\partial x_j^2} + g(\beta_g \theta + \beta_\rho \rho) \hat{e}_y, \quad (1)$$

$$\rho_g c_{p,g} \left( \frac{\partial \theta_g}{\partial t} + u_i \frac{\partial \theta_g}{\partial x_i} \right) = D_g \frac{\partial^2 \theta_g}{\partial x_i^2} - \sum_{n=1}^N c_{p,g} \theta_{g,n} \frac{dm_n}{dt} \delta(\vec{x} - \vec{x}_n) - \sum_{n=1}^N h_m A_n (\theta_{g,n} - \theta_n) \delta(\vec{x} - \vec{x}_n), \quad (2)$$

$$\frac{\partial \rho}{\partial t} + u_i \frac{\partial \rho}{\partial x_i} = D_{vap} \frac{\partial^2 \rho}{\partial x_i^2} - \sum_{n=1}^N \left( \rho_l A_n \frac{dr_n}{dt} \delta(\vec{x} - \vec{x}_n) \right). \quad (3)$$

343 The last term on the right-hand side of equation (1) represents the coupling of temperature and mass  
 344 fraction to the momentum equation.

345 For droplets, the spherical point-particle model is applied, and we consider the conservation of  
 346 momentum (Maxey-Riley equation [69]), energy, and mass as follows:

$$\frac{du_{i,n}}{dt} = (\beta + 1) \frac{Du_{i,f}}{Dt} + (\beta + 1) \frac{3\nu_{air}(u_{i,f} - u_{i,n})}{r_n^2} + g\beta \hat{e}_y, \quad (4)$$

$$\rho_l c_{p,l} V_n \frac{d\theta_n}{dt} = \frac{3L}{r_n} \frac{dr_n}{dt} + h_m A_n (\theta_{g,n} - \theta_n), \quad (5)$$

$$\frac{dr_n}{dt} = -\frac{D_{vap} S h_{drop} \rho_v}{2r_n \rho_l} \ln \left( \frac{1 - \rho_{ambient}}{1 - \rho_{drop}} \right), \quad (6)$$

349 where,  $u_i$ ,  $u_{i,n}$ , and  $u_{i,f}$  are the velocity of gas, droplets, and gas at the location of droplets, respectively.  
 350 Similarly  $\theta_g$ ,  $\theta_n$ , and  $\theta_{g,n}$  are in Kelvin and used to represent the temperature of gas, droplets, and  
 351 gas at the location of droplets, respectively.  $\rho$  is the vapour mass fraction,  $r_n$  the droplet radius,  $A_n$

352 the surface area of the droplets,  $V_n$  the volume of the droplets. Also  $p$  denotes the reduced pressure.  
 353  $h_m$  is the heat transfer coefficient.  $L$  is the latent heat of vaporisation of the liquid.

354 Equation (5) and equation (6) are closed using the Ranz–Marshall correlations [70], which give us  
 355 the estimation of  $h_m$  and  $Sh_{drop}$  for a single spherical droplet.

$$Sh_{drop} = 2 + 0.6Re_{drop}^{1/2}(\nu_{air}/D_{vap})^{1/3}, \quad (7)$$

356

$$h_m r / (D_g c_{p,g} \rho_g) = 2 + 0.6Re_{drop}^{1/2}(\nu_{air}/D_g)^{1/3}, \quad (8)$$

357 where we have droplet Reynolds number

$$Re_{drop} = \frac{|u_{i,f} - u_{i,n}|(2r)}{\nu_{air}}. \quad (9)$$

358 Note that, by definition,  $Sh_{drop}$  and  $Re_{drop}$  are also functions of  $r$ . The realistic parameters needed  
 359 are listed in Extended Data Table (1) and are obtained from [22].

360 The relative humidity at the location of the droplets is defined as  $P_{vap,drop}/P_{sat} = \rho_{vap}/\rho_{sat,vap}$ ,  
 361 where  $\rho_{vap}$  is solved from equation (3). Here, we assume that the temperature is the same. Therefore,  
 362 to calculate the local relative humidity,  $\rho_{sat,vap}$  is first determined by the ideal gas law:

$$\rho_{sat,vap} = \frac{P_{sat}}{R\theta_g}, \quad (10)$$

363 where  $\rho_{sat,vap}$ ,  $P_{sat}$  and  $R$  are the saturated vapour density, saturated pressure, and specific gas  
 364 constant. And through the Antoine’s relation, the saturated pressure can be written as

$$P_{sat}(\theta_g) = 10^5 \exp\left(11.6834 - \frac{3816.44}{226.87 + \theta_g - 273.15}\right). \quad (11)$$

## 365 Numerical setup

366 To numerically solve the equations, we used our finite difference solver AFiD [58] with high-performance  
 367 Message Passing Interface (MPI) and point-particle model. The size of the computational domain in  
 368 dimensional form is 0.18 m (spanwise length)  $\times$  0.37 m (height)  $\times$  1.47 m (streamwise length) and is  
 369 tested to be large enough to capture the cough vapour and spreading droplets. The grid points chosen  
 370 is  $256 \times 512 \times 2048$  to ensure that enough resolution has been employed.

## 371 Cough properties

372 The cough profile we apply is the gamma distribution of the form  $\tilde{U}_{cough}(t) = U_{cough} \alpha t \exp(-\alpha t/4)$ ,  
 373 where  $\alpha = 60.9 \text{ s}^{-1}$  such that the entire cough process lasts for about 0.6 s. For the initial droplet size,  
 374 we employ a similar distribution as [22, 60] with 5000 droplets. The droplets are randomly positioned  
 375 at the inlet and evenly injected in time.

## 376 Lifetime statistics

377 For the small droplets, we compute the 80% life time, i.e. the time needed to shrink to 80% of the initial  
 378 diameter. However, the large droplets rapidly settle to the boundary before reaching this threshold, so  
 379 their 80% life time cannot be directly determined. To overcome this, the life times of these cases are  
 380 estimated using higher diameter thresholds (see Extended Data Table (2)). The thresholds are defined  
 381 such that the number of droplets satisfying the thresholds are at least 97% of the initial number. Then,  
 382 we measure the shrinkage time for each droplets and calculate the ratio of the shrinkage time and to  
 383 the corresponding shrinkage time with Wells’ assumption.

## 384 Wells' assumption

385 In the assumption of Wells' model, the droplets are assumed to be unaffected by flow, so we have  
386 equation (7) and equation (8) equalling 2 and equation (5) becomes  $d\theta_a/dt = 0$ . The ambient tem-  
387 perature and ambient relative humidity remain unchanged with time. The Wells' shrinkage rate is  
388 computed using equation (6) as

$$\left. \frac{d(d^2)}{dt} \right|_{Wells} = -8 \frac{\rho_v}{\rho_{drop}} D_{vap} \ln \left( \frac{1 - \rho_{ambient}}{1 - \rho_{drop}} \right), \quad (12)$$

389 and also the lifetime as a similar manner.

## 390 References

- 391 [1] Bourouiba, L. Turbulent gas clouds and respiratory pathogen emissions: Potential implications  
392 for reducing transmission of COVID-19. *J. Am. Med. Assoc.* **323**, 1837–1838 (2020).
- 393 [2] Asadi, S., Bouvier, N., Wexler, A. S. & Ristenpart, W. D. The coronavirus pandemic and aerosols:  
394 Does COVID-19 transmit via expiratory particles? *Aerosol Science and Technology* (2020).
- 395 [3] Setti, L. *et al.* Airborne transmission route of COVID-19: Why 2 meters/6 feet of inter-personal  
396 distance could not be enough. *Int. J. Environ. Res. Public Health* **17**, 2932 (2020).
- 397 [4] Anfinrud, P., Stadnytskyi, V., Bax, C. E. & Bax, A. Visualizing speech-generated oral fluid  
398 droplets with laser light scattering. *New England J. Med.* (2020).
- 399 [5] Zhang, R., Li, Y., Zhang, A. L., Wang, Y. & Molina, M. J. Identifying airborne transmission as  
400 the dominant route for the spread of COVID-19. *Proc. Nat. Acad. Sci.* (2020).
- 401 [6] Prather, K. A., Wang, C. C. & Schooley, R. T. Reducing transmission of SARS-CoV-2. *Science*  
402 (2020).
- 403 [7] Jayaweera, M., Perera, H., Gunawardana, B. & Manatunge, J. Transmission of COVID-19 virus  
404 by droplets and aerosols: A critical review on the unresolved dichotomy. *Environ. Res.* **118**,  
405 109819 (2020).
- 406 [8] Miller, S. L. *et al.* Transmission of SARS-CoV-2 by inhalation of respiratory aerosol in the Skagit  
407 Valley Chorale superspreading event. *Indoor Air* (2020).
- 408 [9] Buonanno, G., Stabile, L. & Morawska, L. Estimation of airborne viral emission: quanta emission  
409 rate of SARS-CoV-2 for infection risk assessment. *Environ. Int.* 105794 (2020).
- 410 [10] Guenther, T. *et al.* Investigation of a superspreading event preceding the largest meat processing  
411 plant-related SARS-Coronavirus 2 outbreak in Germany (2020).
- 412 [11] Lu, J. *et al.* COVID-19 outbreak associated with air conditioning in restaurant, Guangzhou,  
413 China, 2020. *Emerging Infectious Diseases* **26**, 1628 (2020).
- 414 [12] Anderson, E. L., Turnham, P., Griffin, J. R. & Clarke, C. C. Consideration of the aerosol  
415 transmission for COVID-19 and public health. *Risk Anal.* **40**, 902–907 (2020). 902.
- 416 [13] Stadnytskyi, V., Bax, C. E., Bax, A. & Anfinrud, P. The airborne lifetime of small speech  
417 droplets and their potential importance in SARS-CoV-2 transmission. *Proc. Nat. Acad. Sci.* **117**,  
418 11875–11877 (2020). 11875.
- 419 [14] Schijven, J. F. *et al.* Exposure assessment for airborne transmission of SARS-CoV-2 via breathing,  
420 speaking, coughing and sneezing. *medRxiv* (2020).

- 421 [15] Bahl, P. *et al.* Airborne or droplet precautions for health workers treating coronavirus disease  
422 2019? *J. Infect. Dis.* (2020).
- 423 [16] Toschi, F. & Bodenschatz, E. Lagrangian properties of particles in turbulence. *Annu. Rev. Fluid*  
424 *Mech.* **41**, 375–404 (2009).
- 425 [17] Balachandar, S. & Eaton, J. K. Turbulent dispersed multiphase flow. *Annu. Rev. Fluid Mech.*  
426 **42**, 111–133 (2010).
- 427 [18] Elghobashi, S. Direct numerical simulation of turbulent flows laden with droplets or bubbles.  
428 *Annu. Rev. Fluid Mech.* **51**, 217–244 (2019).
- 429 [19] Miller, R. S. & Bellan, J. Direct numerical simulation of a confined three-dimensional gas mixing  
430 layer with one evaporating hydrocarbon-droplet laden stream. *J. Fluid Mech.* **384**, 293–338 (1999).
- 431 [20] Wells, W. F. On Air-Borne Infection: Study II. Droplets and Droplet Nuclei. *Am. J. Epidemiol.*  
432 **20**, 611–618 (1934).
- 433 [21] Wells, W. F. & Wells, M. W. Air-borne infection. *J. Am. Med. Assoc.* **107**, 1698–1703 (1936).
- 434 [22] Bourouiba, L., Dehandschoewercker, E. & Bush, J. W. Violent expiratory events: on coughing  
435 and sneezing. *J. Fluid Mech.* **745**, 537–563 (2014).
- 436 [23] Wölfel, R. *et al.* Virological assessment of hospitalized patients with COVID-2019. *Nature* **581**,  
437 465–469 (2020).
- 438 [24] Mittal, R., Ni, R. & Seo, J. The flow physics of COVID-19. *J. Fluid Mech.* **894**, F2 (2020).
- 439 [25] World Health Organization. Modes of transmission of virus causing COVID-19: implications for  
440 IPC precaution recommendations: scientific brief, 27 March 2020, updated on 9 July. Tech. Rep.,  
441 World Health Organization (2020).
- 442 [26] World Health Organization. *Infection prevention and control of epidemic-and pandemic-prone*  
443 *acute respiratory infections in health care* (World Health Organization, 2014).
- 444 [27] Lin, J., Yan, K., Zhang, J., Cai, T. & Zheng, J. A super-spreader of COVID-19 in Ningbo city in  
445 China. *J. Infect. Public Health* (2020).
- 446 [28] Mat, N. F. C., Edinur, H. A., Razab, M. K. A. A. & Safuan, S. A single mass gathering resulted  
447 in massive transmission of COVID-19 infections in Malaysia with further international spread. *J.*  
448 *Travel Med.* (2020).
- 449 [29] National Institute of Infectious Diseases, J. Field Briefing: Diamond Princess COVID-19 Cases.  
450 Available at: <https://www.niid.go.jp/niid/en/2019-ncov-e/9407-covid-dp-fe-01.html>. Accessed 4  
451 Aug 2020. (2020).
- 452 [30] Scharfman, B., Techet, A., Bush, J. & Bourouiba, L. Visualization of sneeze ejecta: steps of fluid  
453 fragmentation leading to respiratory droplets. *Exp. in Fluids* **57**, 24 (2016).
- 454 [31] Bourouiba, L. Fluids and health: Disease transmission through the lens of fluid dynamics. *Annu.*  
455 *Rev. Fluid Mech.* **53** (2021).
- 456 [32] De Rivas, A. & Villermaux, E. Dense spray evaporation as a mixing process. *Phys. Rev. Fluids*  
457 **1**, 014201 (2016).
- 458 [33] Villermaux, E., Moutte, A., Amielh, M. & Meunier, P. Fine structure of the vapor field in  
459 evaporating dense sprays. *Phys. Rev. Fluids* **2**, 074501 (2017).
- 460 [34] Langmuir, I. The evaporation of small spheres. *Phys Rev.* **12**, 368 (1918).

- 461 [35] Law, C. K. & Binark, M. Fuel spray vaporization in humid environment. *Int. J. Heat Mass*  
462 *Transf.* **22**, 1009–1020 (1979).
- 463 [36] Lee, A. & Law, C. K. An experimental investigation on the vaporization and combustion of  
464 methanol and ethanol droplets. *Combust. Sci. Technol.* **86**, 253–265 (1992).
- 465 [37] Bontempi, E. First data analysis about possible COVID-19 virus airborne diffusion due to air  
466 particulate matter (PM): The case of Lombardy (Italy). *Environ. Res.* **186** (2020).
- 467 [38] Morawska, L. & Cao, J. Airborne transmission of SARS-CoV-2: The world should face the reality.  
468 *Environ. Int.* **139**, 105730 (2020). 105730.
- 469 [39] Leung, N. H. L. *et al.* Respiratory virus shedding in exhaled breath and efficacy of face masks.  
470 *Nat. Med.* **26**, 676–680 (2020). 676.
- 471 [40] Wilson, N. M., Norton, A., Young, F. P. & Collins, D. W. Airborne transmission of severe acute  
472 respiratory syndrome coronavirus-2 to healthcare workers: a narrative review. *Anaesthesia* (2020).
- 473 [41] Liu, Y. *et al.* Aerodynamic analysis of SARS-CoV-2 in two Wuhan hospitals. *Nature* 1–4 (2020).
- 474 [42] Morawska, L. *et al.* How can airborne transmission of COVID-19 indoors be minimised? *Environ.*  
475 *Int.* **142**, 105832 (2020). 105832.
- 476 [43] Correia, G., Rodrigues, L., da Silva, M. G. & Gonçalves, T. Airborne route and bad use of  
477 ventilation systems as non-negligible factors in SARS-CoV-2 transmission. *Med. Hypotheses* **141**,  
478 109781 (2020). 109781.
- 479 [44] Eslami, H. & Jalili, M. The role of environmental factors to transmission of SARS-CoV-2 (COVID-  
480 19). *AMB Express* **10**, 1–8 (2020).
- 481 [45] Kumar, M., Taki, K., Gahlot, R., Sharma, A. & Dhangar, K. A chronicle of SARS-CoV-2: Part-I -  
482 Epidemiology, diagnosis, prognosis, transmission and treatment. *Sci. Total Environ.* **734**, 139278  
483 (2020). 139278.
- 484 [46] Xie, X., Li, Y., Chwang, A. T. Y., Ho, P. L. & Seto, W. H. How far droplets can move in indoor  
485 environments—revisiting the wells evaporation–falling curve. *Indoor air* **17**, 211–225 (2007).
- 486 [47] Busco, G., Yang, S. R., Seo, J. & Hassan, Y. A. Sneezing and asymptomatic virus transmission.  
487 *Phys. Fluids* **32**, 073309 (2020).
- 488 [48] Feng, Y., Sperry, T., Yi, H. & Marchal, T. Influence of wind and relative humidity on the  
489 social distancing effectiveness to prevent COVID-19 airborne transmission: A numerical study. *J.*  
490 *Aerosol Sc.* **147** (2020).
- 491 [49] Dbouk, T. & Drikakis, D. On coughing and airborne droplet transmission to humans. *Phys.*  
492 *Fluids* **32**, 053310 (2020).
- 493 [50] Abkarian, M., Mendez, S., Xue, N., Yang, F. & Stone, H. Puff trains in speaking produce  
494 long-range turbulent jet-like transport potentially relevant to asymptomatic spreading of viruses.  
495 *arXiv.org* (2020).
- 496 [51] Jenny, P., Roekaerts, D. & Beishuizen, N. Modeling of turbulent dilute spray combustion. *Prog.*  
497 *Energy Combust. Sci.* **38**, 846–887 (2012).
- 498 [52] Mathai, V., Das, A., Bailey, J. A. & Breuer, K. Airflows inside passenger cars and implications  
499 for airborne disease transmission. *arXiv preprint arXiv:2007.03612* (2020).

- 500 [53] Diwan, S. S., Ravichandran, S., Govindarajan, R. & Narasimha, R. Understanding transmission  
501 dynamics of COVID-19-type infections by direct numerical simulations of cough/sneeze flows. *T.*  
502 *of the Ind. Nat. Acad. of Eng.* 1 (2020).
- 503 [54] Riediker, M. & Tsai, D.-H. Estimation of viral aerosol emissions from simulated individuals with  
504 asymptomatic to moderate coronavirus disease 2019. *JAMA Network Open* 3, e2013807–e2013807  
505 (2020).
- 506 [55] Chaudhuri, S., Basu, S., Kabi, P., Unni, V. R. & Saha, A. Modeling the role of respiratory  
507 droplets in COVID-19 type pandemics. *Phys. Fluids* 32, 063309 (2020).
- 508 [56] Somsen, G. A., van Rijn, C., Kooij, S., Bem, R. A. & Bonn, D. Small droplet aerosols in poorly  
509 ventilated spaces and SARS-CoV-2 transmission. *Lancet Respir. Med.* (2020).
- 510 [57] Russo, E., Kuerten, J. G., Van Der Geld, C. & Geurts, B. J. Water droplet condensation and  
511 evaporation in turbulent channel flow. *J. Fluid Mech.* 749, 666–700 (2014).
- 512 [58] van der Poel, E. P., Ostilla-Mónico, R., Donners, J. & Verzicco, R. A pencil distributed finite  
513 difference code for strongly turbulent wall-bounded flows. *Comput. Fluids* 116, 10–16 (2015).
- 514 [59] Yang, Y., Verzicco, R. & Lohse, D. From convection rolls to finger convection in double-diffusive  
515 turbulence. *Proc. Nat. Acad. Sci.* 113, 69–73 (2016).
- 516 [60] Duguid, J. P. The size and the duration of air-carriage of respiratory droplets and droplet-nuclei.  
517 *Epidemiol. Infect.* 44, 471–479 (1946).
- 518 [61] Johnson, G. R. *et al.* Modality of human expired aerosol size distributions. *J. Aerosol Sci.* 42,  
519 839–851 (2011).
- 520 [62] Jones, R. M. & Brosseau, L. M. Aerosol transmission of infectious disease. *J. Occup. Environ.*  
521 *Med.* 57, 501–508 (2015).
- 522 [63] Villermaux, E. Mixing versus stirring. *Annu. Rev. Fluid Mech.* 51, 245–273 (2019).
- 523 [64] Dimotakis, P. E. Turbulent mixing. *Annu. Rev. Fluid Mech.* 37, 329–356 (2005).
- 524 [65] Soper, G. A. The lessons of the pandemic. *Science* 49, 501–506 (1919).
- 525 [66] Parshina-Kottas, Y., Saget, B., Patanjali, K., Fleisher, O. & Gianordoli, G. This 3-d  
526 simulation shows why social distancing is so important. *The New York Times*. Available  
527 at: [https://www.nytimes.com/interactive/2020/04/14/science/coronavirus-transmission-cough-](https://www.nytimes.com/interactive/2020/04/14/science/coronavirus-transmission-cough-6-feet-ar-ul.html)  
528 [6-feet-ar-ul.html](https://www.nytimes.com/interactive/2020/04/14/science/coronavirus-transmission-cough-6-feet-ar-ul.html) (2020).
- 529 [67] Bhagat, R. K. & Linden, P. Displacement ventilation: available ventilation strategy for makeshift  
530 hospitals and public buildings to contain COVID-19 and other airborne diseases. *medRxiv* (2020).
- 531 [68] Linden, P. F. The fluid mechanics of natural ventilation. *Annu. Rev. Fluid Mech.* 31, 201–238  
532 (1999).
- 533 [69] Maxey, M. R. & Riley, J. J. Equation of motion for a small rigid sphere in a nonuniform flow.  
534 *Phys. Fluids* 26, 883–889 (1983).
- 535 [70] Ranz, W. E. & Marshall Jr., W. R. Evaporation from drops. *Chem. Eng. Prog.* 48, 141–146  
536 (1952).



537 **Acknowledgements:** This work was funded by the ERC Advanced Grant DDD, Number 740479  
538 and by several NWO grants. The funders have no role in study design, data collection and analysis or  
539 decision to publish. The simulations were performed on the national e-infrastructure of SURFsara, a  
540 subsidiary of SURF cooperation, the collaborative ICT organization for Dutch education and research,  
541 and the Irish Centre for High-End Computing (ICHEC).

542

543 **Author contributions:** C.S.N., K.L.C., and N.H. planned and performed code development and  
544 evaluated the data. C.S.N., K.L.C. and R.Y. performed simulations. C.S.N., K.L.C., N.H. and R.Y.  
545 analysed data. R.V. managed initial code development and supervised the simulations. D.L. initiated,  
546 designed, and supervised the project. All authors wrote the manuscript.

547

548 **Competing interests:** The authors declare no competing interests.

549

550 **Correspondence and requests for materials** should be addressed to D.L.

**Extended Data Table 1: Definition of realistic parameters employed in the numerical simulations of this study\*.**

| Cough and vapour properties            | Symbols          | Values                                                      |
|----------------------------------------|------------------|-------------------------------------------------------------|
| The vapour mass density                | $\rho_v$         | 4.85 mg/l                                                   |
| The temperature of coughing vapour     | $\theta_{cough}$ | 34 °C                                                       |
| The vapour specific heat capacity      | $c_{p,v}$        | 1.996 kJ/kg/K                                               |
| The mean velocity of cough             | $U_{cough}$      | 11.2 m/s                                                    |
| The diameter of mouth                  | $D_{mouth}$      | 2.3 cm                                                      |
| The diffusivity of water vapour in air | $D_{vap}$        | $2.5 \times 10^{-5} \text{m}^2/\text{s}$                    |
| Air properties                         | Symbols          | Values                                                      |
| The air mass density                   | $\rho_{ambient}$ | 1.204 kg/m <sup>3</sup>                                     |
| The temperature of air                 | $\theta_a$       | 20 °C                                                       |
| The air viscosity                      | $\nu_{air}$      | $1.562 \times 10^{-5} \text{m}^2/\text{s}$                  |
| The thermal expansion coefficient      | $\beta_\theta$   | $3.5 \times 10^{-3}/\text{K}$                               |
| The air specific heat capacity         | $c_{p,a}$        | 1 kJ/kg/K                                                   |
| The thermal diffusivity of air         | $D_g$            | $22.39 \times 10^{-6} \text{m}^2/\text{s}$ for air at 25 °C |
| Latent heat                            | $L$              | 2256 kJ/kg                                                  |
| Droplets properties                    | Symbols          | Values                                                      |
| The droplet density                    | $\rho_l$         | 993 kg/m <sup>3</sup>                                       |
| Density ratio term                     | $\beta$          | $0.5 \times 10^{-3}$                                        |
| The droplet specific heat capacity     | $c_{p,l}$        | 4.186 kJ/kg/K                                               |

\*Here we use the characteristic values taken from [22].

**Extended Data Table 2: The diameter threshold and the corresponding bin range of droplet diameter**

| Threshold | Bin range of droplet diameter in logarithm ( $\log(d_0)$ ) [ $\mu\text{m}$ ] |
|-----------|------------------------------------------------------------------------------|
| 0.8       | [1.0, 1.1]                                                                   |
| 0.9       | [1.1, 1.3]                                                                   |
| 0.95      | [1.3, 1.5]                                                                   |
| 0.97      | [1.5, 1.7]                                                                   |
| 0.99      | [1.7, 1.9]                                                                   |
| 0.992     | [1.9, 2.1]                                                                   |
| 0.993     | [2.1, 2.3]                                                                   |
| 0.995     | [2.3, 2.5]                                                                   |
| 0.999     | [2.5, 2.7]                                                                   |
| 0.999     | [2.7, 2.9]                                                                   |
| 0.9992    | [2.9, 3.1]                                                                   |
